1 **Geographic clusters of objectively measured physical activity and the characteristics**  
2 **of their built environment in a Swiss urban area**

3 Short title: Geographic clusters of physical activity and the built environment

4

5 Authors: Juan R Vallarta-Robledo<sup>1, 2, 3</sup>, Stéphane Joost<sup>1, 3, 4, 5</sup>, Marco André Vieira Ruas<sup>4</sup>,

6 Cédric Gubelmann<sup>6</sup>, Peter Vollenweider<sup>6</sup>, Pedro Marques-Vidal<sup>3, 6</sup>, Idris Guessous<sup>1, 2, 3\*</sup>

7

8 <sup>1</sup> Division and Department of Primary Care Medicine, Geneva University Hospitals,

9 Geneva, Switzerland

10 <sup>2</sup> Faculty of Medicine, University of Geneva, Geneva, Switzerland

11 <sup>3</sup> Group of Geographic Information Research and Analysis in Population Health

12 (GIRAPH), Geneva, Switzerland

13 <sup>4</sup> Laboratory of Geographic Information Systems (LASIG), School of Architecture, Civil

14 and Environmental Engineering (ENAC), École Polytechnique Fédérale de Lausanne

15 (EPFL), Lausanne, Switzerland

16 <sup>5</sup> La Source, School of Nursing, University of Applied Sciences and Arts Western

17 Switzerland (HES-SO), Lausanne, Switzerland

18 <sup>6</sup> Department of Medicine, Internal Medicine, Lausanne University Hospital (CHUV) and

19 University of Lausanne, Lausanne, Switzerland

20

21 \*Corresponding author:

22 Email: [idriss.guessous@hcuge.ch](mailto:idriss.guessous@hcuge.ch) (IG)

## 23 **Abstract**

24 **Introduction** Evidence suggests that the built environment can influence the intensity of  
25 physical activity. However, despite the importance of the geographic context, most of the  
26 studies do not consider the spatial framework of this association. We aimed to assess  
27 individual spatial dependence of objectively measured moderate and vigorous physical  
28 activity (MVPA) and describe the characteristics of the built environment among spatial  
29 clusters of MVPA.

30 **Methods** Cross-sectional data from the second follow-up (2014-2017) of  
31 CoLaus|PsyCoLaus, a longitudinal population-based study of the Lausanne area  
32 (Switzerland), was used to objectively measure MVPA using accelerometers. Local  
33 Moran's I was used to assess the spatial dependence of MVPA and detect geographic  
34 clusters of low and high MVPA. Additionally, the characteristics of the built environment  
35 observed in the clusters based on raw MVPA and MVPA adjusted for socioeconomic and  
36 demographic factors were described.

37 **Results** Data from 1,889 participants (median age 63, 55% women) were used. The  
38 geographic distribution of MVPA and the characteristics of the built environment among  
39 clusters were similar for raw and adjusted MVPA. In the adjusted model, we found a low  
40 concentration of individuals within spatial clusters of high MVPA (median: 36.9 mins; 3%  
41 of the studied population) and low MVPA (median: 10.1 mins; 2% of the studied  
42 population). Yet, clear differences were found in both models between clusters regarding  
43 the built environment; high MVPA clusters were located in areas where specific  
44 compositions of the built environment favor physical activity.

45    **Conclusions** Our results suggest the built environment may influence spatial patterns of  
46    MVPA independently of socioeconomic and demographic factors. Interventions in the built  
47    environment should be considered to promote physically active behaviors in urban areas.

48

49    **Keywords** Spatial analysis; physical activity; built environment; spatial epidemiology;

50    MVPA

## 51 **Introduction**

52 Regular physical activity improves health status and prevents chronic diseases [1,2]. For  
53 such reasons, the World Health Organization (WHO) recommends 150 minutes of  
54 moderate-intensity, 75 minutes of vigorous-intensity per week, or a combination of  
55 moderate and vigorous physical activity (MVPA) [3]. However, despite the benefits of  
56 consistent MVPA, current trends do not show an encouraging increment of these  
57 recommendations in the population [4]. Regular practice of physical activity depends on a  
58 series of determinants, including biological, psychological, cultural, socioeconomic, and  
59 environmental [5,6]. The built environment can influence physical activity and promote  
60 healthy lifestyles through different settings [7,8]. Indeed, individuals living in areas with  
61 higher accessibility to walking, cycling, and public transport infrastructure, street  
62 connectivity and accessibility to diverse destinations, the presence of diverse land use (i.e.  
63 residential zones mixed with public, recreational and commercial areas), larger access to  
64 recreational areas of quality, and greater population density have been associated with  
65 higher levels of physical activity [9–11].  
66 This is of major importance as it supports the development of public policies promoting  
67 physically active behaviors at the community level. To facilitate healthy environments and  
68 target areas for intervention, it is important to identify and understand the spatial  
69 distribution of health outcomes and environmental characteristics [12,13]. Spatial statistics  
70 and related clustering methods are of great help to reveal non-random geographic patterns  
71 of a given outcome and have become popular in recent years in epidemiological studies  
72 [14,15]. However, despite the importance of the geographic context in the association

73 between the built environment and physical activity, most previous research did not  
74 consider the spatial factor.

75 Studies using a spatial methodology to assess this relationship have shown partial  
76 associations [16–23]. This mixed evidence may result from the fact that these works  
77 analyze the association at an aggregated level (i.e. statistical subsectors, counties, etc.) [16–  
78 20], which may not always reflect the real geographic context [24,25]. Furthermore, of  
79 these studies, only one objectively measured physical activity [18]. Among the research  
80 works assessing spatial patterns of physical activity at an individual scale, all were based on  
81 self-reported physical activity [21–23], which limits their conclusions.

82 We aimed to assess the spatial dependence of objectively measured MVPA in the urban  
83 area of Lausanne using individual accelerometry and geolocated data. Additionally, we  
84 measured and described the built environment characteristics among the spatial clusters of  
85 both raw MVPA and MVPA adjusted for socioeconomic and demographic factors.

## 86 **Materials and Methods**

### 87 **Urban area of Lausanne**

88 The city of Lausanne covers an area of 41.37 km<sup>2</sup> with a population of 144,790 inhabitants  
89 in 2017, and it is divided into 81 statistical sub-sectors  
90 (<https://www.lausanne.ch/officiel/statistique.html>). It has around 350 hectares of parks and  
91 gardens, 111 km of cycling pathways (<https://www.lausanne.ch/officiel/statistique.html>),  
92 two metro and 42 bus and trolleybus lines (<https://rapportannuel.t-l.ch>) (S1 Fig).

### 93 **Health data**

94 Data were obtained from CoLaus|PsyCoLaus cohort, a longitudinal population-based study  
95 started in 2003-2006, whose main aim is to explore the determinants of cardiovascular  
96 diseases in individuals aged 35-75 years in Lausanne, Switzerland [26]. The second follow-  
97 up of the cohort was carried out from 2014 to 2017 and collected physical activity  
98 information by accelerometry (see below). Because of this, we only considered cross-  
99 sectional data from this second follow-up for analysis.

100 Only individuals of the second follow-up who participated in the collection of  
101 accelerometry data were considered for analysis. Participants were excluded if they did not  
102 have valid accelerometry data (see below), lived of outside the urban area of Lausanne, or  
103 if geolocated data or covariates (see below) were missing.

104 The institutional Ethics Committee of the University of Lausanne, which afterwards  
105 became the Ethics Commission of Canton Vaud ([www.cer-vd.ch](http://www.cer-vd.ch)) approved the baseline  
106 CoLaus study (reference 16/03). The approval was renewed for the first (reference 33/09)  
107 and the second (reference 26/14) follow-ups. The study was performed in agreement with

108 the Helsinki declaration and its former amendments, and in accordance with the applicable  
109 Swiss legislation. All participants gave their signed informed consent before entering the  
110 study.

## 111 **Physical activity data collection process**

112 A detailed description of the physical activity data collection process was described  
113 previously by Gubelmann et al. [27]. Overall, physical activity data were obtained from a  
114 wrist-worn triaxial accelerometer (GENEActiv, Activinsights Ltd., United Kingdom) used  
115 in the right wrist of the participants at a frequency of 50 Hz for 14 days and converted into  
116 1-minute epoch files using the GENEActiv macros [28]. The GGIR algorithm [29] was  
117 then used to transform accelerometry data suitable for analysis. Additionally, we used the  
118 PAMPRO methodology [30] as a sensitivity analysis to validate the findings obtained,  
119 results are shown in S2 Fig. Data were valid if individuals had accelerometry information  
120  $\geq 10$  h during weekdays and  $\geq 8$  h during weekends [27]. A minimum of 5 days for  
121 weekdays and 2 days for weekends of accelerometry recorded data were required to  
122 consider observations valid for analysis [31].

123 Daily sedentary, light, moderate, and vigorous physical activity intensities were averaged  
124 and stratified by weekdays and weekends. MVPA intensities were considered to assess  
125 physical activity. MVPA is defined as the sum (in minutes) of the average daily moderate  
126 and vigorous physical activity obtained from the accelerometry data. Stratified results for  
127 weekdays and weekends are shown in S3 Fig.

## 128 **Covariates**

129 Individual data were self-reported and physical measures (i.e. height and weight) were  
130 taken by trained professionals in a single visit at the Centre Hospitalier Universitaire

131 Vaudois. Socioeconomic and demographic covariates were age (years), gender, ethnicity  
132 (white and non-white), marital status (single, married, divorced, or widowed), education  
133 level (low, medium, or high), and work status (low, medium, high, or not working). We  
134 also included the annual median household income at the neighborhood level (1 CHF= 1.10  
135 USD, November 2020) obtained from the 2009 Lausanne Census  
136 (<https://www.vd.ch/themes/etat-droit-finances/statistique>) and assigned to the place of  
137 residence of each individual. Additionally, we assessed the body mass index (BMI).  
138 As factors characterizing the built environment, we considered the number of parks and  
139 their location obtained from the Federal Office of Topography  
140 (<https://www.swisstopo.admin.ch/en/home.html>), cycling pathways length and preferential  
141 pedestrian zones (pedestrian and meeting places) from the Service des Routes et de la  
142 Mobilité (<https://www.asitvd.ch/>), population density (years 2014-2017) and land use mix  
143 area coverage from the Federal Statistical Office (FSO) reported at the hectometric level  
144 (<https://www.bfs.admin.ch/bfs/en/home.html>). Land use mix area coverage was calculated  
145 using the formula proposed by Frank et al. [32] and adapted to 5 land use categories  
146 reported by the FSO (residential, commercial & industrial, public, recreational, and  
147 natural). We also used this formula to calculate the coverage area of each individual land  
148 use category. Results range from 0 to 1; 0 stands for no land use mix area coverage and 1  
149 for maximum land use mix area coverage. Likewise, to evaluate public transport  
150 accessibility, we calculated the number of public transport stops and the walking time it  
151 takes to reach the closest public transport stop from the place of residence of each  
152 individual using street network data from © OpenStreetMap contributors  
153 (<https://www.openstreetmap.org/copyright>) and Tobler's Hiking function [33]. We also  
154 used this data source to calculate street connectivity (3 or greater number of streets



155 intersections). All these built environmental variables were assigned to the place of  
156 residence of each participant within a buffer of 800 m and, except for land use mix area  
157 coverages and walking time to reach the closest public transport stop, values were divided  
158 by the buffer's area (1.98 km<sup>2</sup>).

## 159 **Statistical analysis**

160 We calculated Local Moran's I (LMI) to identify possible spatial clusters of MVPA. LMI  
161 measures spatial dependence and highlights local clusters of the variable of interest, here  
162 MVPA [34]. This method was derived from the global Moran's I index that evaluates  
163 spatial autocorrelation of a variable across a geographic area and ranges from -1 to 1 [35].  
164 A value of 0 indicates no spatial dependence (observations are randomly distributed in  
165 space). A Moran's scatterplot displays the relationship between the observed MVPA for  
166 individual *i* and the mean MVPA for the individuals located in a specified neighborhood  
167 around individual *i* (the weighted MVPA). Four distinct categories are identified according  
168 to the position of individuals in the four quadrants of the Moran's scatterplot: i) high-high:  
169 individuals with a high MVPA surrounded by neighbors showing a high MVPA also, ii)  
170 low-low: individuals with a low MVPA surrounded by neighbors with a low MVPA also,  
171 iii) low-high: individuals with low MVPA surrounded by neighbors with a high MVPA  
172 (considered as outliers), iv) high-low: individuals with a high MVPA and surrounded by  
173 neighbors with low a MVPA (outliers also). There is an additional fifth category  
174 corresponding to individuals which are randomly distributed in space. The latter category is  
175 determined using a significance test based on Monte-Carlo random permutations of MVPA  
176 observations [34]. It is calculated as  $(M+1) / (P+1)$ ; *P* corresponds to the number of  
177 permutations and *M* to the number of instances where a permutation statistic is greater or

178 equal than the observed value (if positive LMI), or lower or equal than the observed value  
179 (if negative LMI). In this study, we tested 999 Monte-Carlo permutations and an  $\alpha$  level of  
180 0.05, the spatial lag used was 800 m [36]. LMI was calculated on raw MVPA and on  
181 MVPA adjusted for socioeconomic and demographic factors using a linear median  
182 regression (S1 Appendix). MVPA exhibited a non-normal distribution and was transformed  
183 to its square root to obtain a normal distribution for statistical analysis and was back-  
184 transformed to its real value for the description of the results. We also ran LMI using  
185 different spatial lags of 400, 600, 1000, and 1200 m, and the analyses showed similar  
186 spatial patterns to the ones we obtained with 800m (S4 Fig).

187 Due to the low number of individuals contained within the spatial clusters observed,  
188 statistical comparisons were carried out using non-parametric methods (significance  
189 threshold of  $p < 0.05$ ); chi-square or fisher tests (when  $N < 5$ ) for categorical data, and  
190 Kruskal Wallis tests (including Bonferroni-Holm's correction) for numeric variables.

191 Because of the above, data are reported as median and interquartile range (IQR) for  
192 numeric variables and frequencies and percentages (%) for categorical information.

193 Analyses were performed in R version 3.6.3 [37]. Additionally, the rgeoda library [38] was  
194 used to run spatial analyses, sf [39] to calculate densities and lengths in spatial buffers for  
195 each individual. Maps were drawn with ggplot2 [40].

## 196 **Results**

197 The initial sample consisted of 2,967 individuals that participated in the collection of  
198 accelerometry data. Among them, 945 individuals living outside the urban area of Lausanne  
199 and without valid accelerometry and geolocation data were removed, leading to a dataset of  
200 2,022 observations (68%). A further 133 (6%) observations had missing data and were also  
201 removed, leading to a final sample of 1,889 individuals.

202 Individual variables and characteristics on the built environment of the studied and  
203 removed individuals are described in S1 Table. Overall, the median age of the studied  
204 individuals was 63 years (IQR: 16) and there were 1,409 (55%) women. The mean daily  
205 MVPA was 20.3 mins (IQR: 23.0).

### 206 **Spatial clusters of raw MVPA and adjusted MVPA**

207 We detected spatial clusters of raw MVPA in the urban area of Lausanne (Fig 1). We  
208 identified one small, but statistically significant, concentration of individuals (1%) in  
209 clusters of high MVPA and a concentration of 2% of participants with discordant MVPA  
210 levels (Low-High) in the south-western region of the urban area (landmark #1). A small  
211 concentration (1%) of participants in low MVPA clusters and individuals having  
212 intertwined values of MVPA (High-Low) were observed in the north-western, eastern, and  
213 southern regions (landmarks #2-4).

214

215 **Fig 1. Spatial clusters of raw MVPA using Local Moran's I statistics.** Statistical  
216 significance is assessed based on an  $\alpha$  threshold of  $p < 0.05$  within a spatial lag of 800 m.  
217 Dark-green dots indicate individuals with high MVPA values surrounded by neighbors also  
218 showing high MVPA values; red dots indicate individuals with low MVPA surrounded by

219 neighbors with low MVPA values; light-green dots indicate individuals with high MVPA  
220 values surrounded by neighbors showing low MVPA values; pink dots indicate individuals  
221 with low MVPA values surrounded by neighbors with high MVPA values; white dots  
222 indicate individuals whose MVPA values are randomly distributed in the geographic space.  
223 Landmarks (1-4) are shown to facilitate the description and interpretation of the results.

224

225 Spatial clusters of MVPA adjusted for socioeconomic and demographic factors (Fig 2)  
226 were geographically distributed similarly to the clusters of raw MVPA (Fig 1). However,  
227 there was a higher concentration of Low-Low and High-Low clusters in the north-western  
228 area (landmark #2) and a lower concentration in the eastern and southern regions  
229 (landmarks #3 and #4). The overall size of low-low clusters increased from 1% to 2% of  
230 the studied population. High-High clusters increased their size from 1% to 3% (landmark  
231 #1).

232

233 **Fig 2. Spatial clusters of MVPA adjusted for socioeconomic and demographic factors**  
234 **using Local Moran's I statistics.** Statistical significance is assessed based on an  $\alpha$   
235 threshold of  $p < 0.05$  within a spatial lag of 800 m. Dark-green dots indicate individuals with  
236 high MVPA values surrounded by neighbors also showing high MVPA values; red dots  
237 indicate individuals with low MVPA surrounded by neighbors with low MVPA values;  
238 light-green dots indicate individuals with high MVPA values surrounded by neighbors  
239 showing low MVPA values; pink dots indicate individuals with low MVPA values  
240 surrounded by neighbors with high MVPA values; white dots indicate individuals whose  
241 MVPA values are randomly distributed in the geographic space. Landmarks (1-4) are  
242 shown to facilitate the description and interpretation of the result.

## 243 **Built environment characteristics in raw MVPA spatial clusters**

244 Statistically significant built environment differences ( $p < 0.05$ ) were observed among  
245 spatial clusters of raw MVPA (Table 1). Clusters with high levels of MVPA (High-High)  
246 were located in areas with a higher number of parks (high: 2 vs low: 0), public transport  
247 stops (high: 28 vs low: 11), preferential pedestrian areas (high: 3 vs low: 2), cycling  
248 pathways (high: 6.7 vs low: 1.8 km), interconnected streets (high: 133 vs low: 55),  
249 population density (high: 11,708 vs low: 5,061), and public (high: 0.28 vs low: 0.21), and  
250 commercial & industrial land use areas (high: 0.18 vs low: 0.03) compared to clusters of  
251 low MVPA (Low-Low). In contrast, clusters of low MVPA were in locations with a higher  
252 presence of natural areas (low: 0.25 vs high: 0). Socioeconomic characteristics of  
253 individuals among clusters can be observed in S2 Table; older participants and the  
254 proportion of non-workers were statistically higher in low MVPA clusters.

255 **Table 1. Built environment characteristics in raw MVPA spatial clusters.**

| Built environment characteristics                    | No spatial dependence | High-High    | Low-Low     | High-Low    | Low-High     | p-value <sup>a</sup> |
|------------------------------------------------------|-----------------------|--------------|-------------|-------------|--------------|----------------------|
| N                                                    | 1793 (95%)            | 27 (1%)      | 13 (1%)     | 14 (1%)     | 42 (2%)      |                      |
| MVPA (mins)                                          | 20.3 (23.2)           | 35.2 (29.9)  | 16.5 (9.8)  | 37.8 (26.1) | 12.1 (10.0)  | <0.001 <sup>b</sup>  |
| Number of parks                                      | 2 (2)                 | 2 (1)        | 0 (1)       | 0 (1)       | 2 (1)        | <0.001 <sup>c</sup>  |
| Number of public transport stops                     | 20 (10)               | 28 (5)       | 11 (4)      | 16 (4)      | 27 (6)       | <0.001 <sup>c</sup>  |
| Walking time to closest public transport stop (mins) | 6.1 (4.1)             | 6.2 (3.0)    | 7.2 (7.3)   | 7.8 (5.5)   | 6.1 (5.6)    | 0.22                 |
| Number of preferential pedestrian areas              | 3 (6)                 | 3 (1)        | 2 (1)       | 2 (2)       | 3 (2)        | 0.001 <sup>c</sup>   |
| Number of cycling path length (km)                   | 4.2 (3.1)             | 6.7 (0.7)    | 1.8 (1.8)   | 3.1 (0.6)   | 6.7 (0.6)    | <0.001 <sup>c</sup>  |
| Number of interconnected streets >3                  | 110 (63)              | 133 (50)     | 55 (23)     | 73 (24)     | 133 (57)     | <0.001 <sup>c</sup>  |
| Population density                                   | 8838 (4933)           | 11708 (5655) | 5061 (1831) | 7016 (2004) | 12365 (6349) | <0.001 <sup>d</sup>  |
| Land use mix area coverage                           | 0.69 (0.11)           | 0.72 (0.05)  | 0.46 (0.39) | 0.78 (0.29) | 0.71 (0.06)  | 0.26                 |
| Residential area coverage                            | 0.33 (0.06)           | 0.33 (0.05)  | 0.20 (0.17) | 0.36 (0.12) | 0.33 (0.05)  | 0.45                 |
| Commercial & industrial area coverage                | 0.07 (0.08)           | 0.18 (0.03)  | 0.03 (0.13) | 0.12 (0.10) | 0.18 (0.04)  | <0.001 <sup>c</sup>  |
| Public places area coverage                          | 0.27 (0.08)           | 0.28 (0.02)  | 0.21 (0.01) | 0.22 (0.04) | 0.28 (0.02)  | <0.001 <sup>c</sup>  |
| Recreational area coverage                           | 0.31 (0.11)           | 0.32 (0.06)  | 0.09 (0.28) | 0.28 (0.23) | 0.33 (0.06)  | 0.02 <sup>e</sup>    |
| Natural area coverage                                | 0.15 (0.24)           | 0 (0.04)     | 0.25 (0.09) | 0.30 (0.09) | 0 (0.04)     | <0.001 <sup>c</sup>  |

256 Except for N, variables are described using the median (IQR).

257 <sup>a</sup> p-values for High-High vs High-Low vs Low-High vs Low-low

258 <sup>b</sup> High-High and High-Low were statistically different from Low-Low and Low-High clusters.

259 <sup>c</sup> High-High and Low-High were statistically different from Low-Low and High-Low clusters.

260 <sup>d</sup> High-High and Low-High were statistically different from Low-Low and High-Low clusters, but also High-Low statistically different  
 261 from Low-Low clusters.

262 <sup>e</sup> Low-High was statistically different from Low-Low clusters.

263 **Built environment characteristics in MVPA spatial clusters after**  
264 **adjustment for socioeconomic and demographic factors**

265 The characteristics of the built environment among spatial clusters of MVPA adjusted for  
266 socioeconomic and demographic factors (Table 2) were similar to the raw MVPA model.  
267 Clusters of high MVPA (High-High) presented a higher number of parks (high: 2 vs low:  
268 0), public transport stops (high: 22 vs low: 12), preferential pedestrian areas (high: 3 vs low:  
269 1), cycling pathways (high: 6.7 vs low: 2.6 km), interconnected streets (high: 128 vs low:  
270 52), population density (high: 8,839 vs low: 5,896), and public (high: 0.27 vs low: 0.21),  
271 and commercial & industrial land use areas (high: 0.20 vs low: 0.14) than clusters of low  
272 MVPA (Low-Low). High MVPA clusters were also located in areas where the amount of  
273 walking time to reach the closest public transport stops was shorter than low MVPA (high  
274 5.6 vs low: 8.9 mins). Likewise, clusters of low MVPA showed more natural (low: 0.32 vs  
275 high: 0) and residential areas (low: 0.37 vs high: 0.35) and land use mix area coverage (low:  
276 0.86 vs high: 0.73). Socioeconomic and demographic characteristics are described in S3  
277 Table; neighborhood household income was statistically significantly lower in low MVPA  
278 clusters.

279 **Table 2. Built environment characteristics in spatial clusters of MVPA adjusted for socioeconomic and demographic factors.**

| Built environment characteristics                    | No spatial dependence | High-High   | Low-Low     | High-Low    | Low-High    | p-value <sup>a</sup> |
|------------------------------------------------------|-----------------------|-------------|-------------|-------------|-------------|----------------------|
| N                                                    | 1724 (91%)            | 57 (3%)     | 28 (2%)     | 25 (1%)     | 55 (3%)     |                      |
| MVPA (mins)                                          | 20.4 (23.0)           | 36.9 (35.3) | 10.1 (12.1) | 33.2 (20.6) | 11.3 (12.8) | <0.001 <sup>b</sup>  |
| Number of parks                                      | 2 (2)                 | 2 (1)       | 0 (1)       | 0 (1)       | 1 (1)       | <0.001 <sup>c</sup>  |
| Number of public transport stops                     | 21 (10)               | 22 (5)      | 12 (4)      | 13 (4)      | 23 (4)      | <0.001 <sup>c</sup>  |
| Walking time to closest public transport stop (mins) | 6.0 (4.0)             | 5.6 (4.3)   | 8.9 (4.6)   | 8.8 (3.2)   | 6.1 (4.00)  | <0.001 <sup>d</sup>  |
| Number of preferential pedestrian areas              | 3 (6)                 | 3 (1)       | 1 (1)       | 1 (1)       | 3 (1)       | <0.001 <sup>c</sup>  |
| Number of cycling path length (km)                   | 4.1 (2.9)             | 6.7 (0.6)   | 2.6 (0.7)   | 2.7 (0.5)   | 6.5 (0.7)   | <0.001 <sup>c</sup>  |
| Number of interconnected streets >3                  | 111 (63)              | 128 (29)    | 52 (14)     | 54 (18)     | 128 (27)    | <0.001 <sup>c</sup>  |
| Population density                                   | 8950 (4956)           | 8839 (4590) | 5896 (1318) | 6023 (1780) | 8995 (3711) | <0.001 <sup>c</sup>  |
| Land use mix area coverage                           | 0.69 (0.11)           | 0.73 (0.04) | 0.86 (0.03) | 0.86 (0.03) | 0.74 (0.04) | <0.001 <sup>c</sup>  |
| Residential area coverage                            | 0.33 (0.06)           | 0.35 (0.04) | 0.37 (0)    | 0.37 (0)    | 0.36 (0.03) | <0.001 <sup>c</sup>  |
| Commercial & industrial area coverage                | 0.06 (0.08)           | 0.20 (0.05) | 0.14 (0.02) | 0.14 (0.03) | 0.20 (0.06) | <0.001 <sup>c</sup>  |
| Public places area coverage                          | 0.28 (0.08)           | 0.27 (0.02) | 0.21 (0.03) | 0.22 (0.04) | 0.27 (0.02) | <0.001 <sup>c</sup>  |
| Recreational area coverage                           | 0.31 (0.11)           | 0.36 (0.04) | 0.34 (0.02) | 0.35 (0.02) | 0.36 (0.03) | 0.04 <sup>e</sup>    |
| Natural area coverage                                | 0.15 (0.23)           | 0 (0.04)    | 0.32 (0.02) | 0.32 (0.03) | 0 (0.02)    | <0.001 <sup>c</sup>  |

280 Except for N, variables are described using the median (IQR).

281 <sup>a</sup> p-values for High-High vs High-Low vs Low-High vs Low-low

282 <sup>b</sup> High-High and High-Low were statistically different from Low-Low and Low-High clusters.

283 <sup>c</sup> High-High and Low-High were statistically different from Low-Low and High-Low clusters.

284 <sup>d</sup> High-High and Low-High were statistically different from Low-Low, High-Low statistically different from High-High but not Low-High clusters.

285 <sup>e</sup> High-High and Low-High were statistically different from Low-Low but not High-Low clusters.



## 287 **Discussion**

288 We observed geographic clusters of high and low MVPA in the urban area of Lausanne.  
289 Despite the low number of individuals within clusters, we identified clear differences in the  
290 composition of the built environment among clusters, showing that there is a particular  
291 underlying composition of the built environment in high MVPA clusters, and a clearly  
292 different composition of the built environment in low MVPA clusters. Spatial clusters of  
293 high MVPA were located in zones with a higher population density, a better accessibility to  
294 parks and to public transportation, more cycling pathways, preferential pedestrian zones,  
295 interconnected streets, and public, commercial & industrial zones. As an example, the  
296 larger high MVPA cluster (landmark #1 on Fig 1) was clearly located right next to a  
297 recreation area equipped with sports facilities on the shores of the lake. The geographic  
298 distribution of MVPA was similar for the raw MVPA model and the model adjusted for  
299 socioeconomic and demographic factors.

300 Despite socioeconomic status has been associated as a mediator in the association of the  
301 built environment and physical activity [41,42], we did not find clear socioeconomic and  
302 demographic differences among clusters of low and high MVPA. However, we did  
303 highlight an older population and a higher proportion of non-workers in low raw MVPA  
304 clusters, and a lower neighborhood household income in low MVPA clusters after  
305 adjustment for socioeconomic and demographic factors. Huang et al. [21], Tamura et al.  
306 [19], and Valson et al. [23] also observed inconsistent findings related to socioeconomic  
307 determinants and spatial clusters of physical activity. These inconsistencies may be related  
308 to our lack of adjustment for social conditions, such as crime rates, pedestrian safety, and  
309 harmful land uses [43].

310 Studies that have explored the association of the built environment with physical activity  
311 from a geographic perspective have found mixed evidence [19,20,22]. However, there is an  
312 overall agreement that environments that favor walkability, such as higher population  
313 density and street connectivity, are associated with higher physical activity levels  
314 [18,19,21,23]. In contrast, we did not find a positive association between a higher land use  
315 area coverage with the spatial clusters of high physical activity [18,19,23]. This is probably  
316 because we were unable to stratify by different types of commercial & industrial land use  
317 areas such as food, retails, services, cultural, and physical activity as proposed by Frank et  
318 al. [32].

319 The association between spatial clusters of physical activity and green areas is debatable,  
320 with no clear positive association [20,23]. We found that clusters with high MVPA  
321 exhibited a higher density of parks and recreational areas but not natural areas. This may  
322 highlight important considerations when measuring greenness. As natural areas are usually  
323 located at the boundaries of the urban perimeter, the presence of greener areas may not  
324 necessarily imply they are adequate or accessible for leisure physical activity or active  
325 transportation due to long commuting distances to the destination of individuals [44,45].  
326 Additionally, we hypothesized that city dwellers need a minimum of urban infrastructure or  
327 of motivation (i.e. shopping) to move, and that they are not attracted by these natural areas  
328 despite their obvious health benefits.

329 In addition to the above built environmental factors, we also included other determinants,  
330 which to our knowledge, are not typically used when analyzing the association between the  
331 built environment and spatial clusters of physical activity. We observed that clusters with  
332 high MVPA values were located in areas with higher accessibility to cycling pathways and  
333 areas that favor pedestrians. Such findings are consistent with other studies not following a

334 spatial methodology [7,44,46]. Similarly, as found in our study, higher accessibility to  
335 public transport has also been associated to higher levels of physical activity [7].  
336 Geographic patterns of MVPA on weekdays were similar to the patterns on weekends.  
337 However, we observed a higher concentration of individuals in MVPA clusters during  
338 weekdays, which may highlight different physical activity interactions of individuals with  
339 their built environment depending on the day of the week [47,48]. The comparison of the  
340 GGIR algorithm with the PAMPRO methodology to calculate MVPA showed some  
341 similarities but also some differences in their MVPA spatial distribution. We decided to use  
342 GGIR, but certainly, we could also have chosen PAMPRO for our main analysis. Further  
343 studies are needed to validate which method is best suited to measure physical activity  
344 using accelerometry data.  
345 Interestingly, we observed similarities between the geographic distribution of MVPA and  
346 the distribution of BMI observed in a previous study of the same urban area [36]: one  
347 cluster of low MVPA overlaps a cluster of high BMI and a cluster of high MVPA overlaps  
348 a cluster of low BMI. This finding is aligned with another study that has found overlapping  
349 clusters of BMI and physical activity [49] and could be of great help as a measure of the  
350 success of policies promoting healthier built environments.

## 351 **Limitations**

352 Our study has several limitations. First, we were not able to assess the working  
353 environment nor to track the exact location where people performed physical activity,  
354 which would be useful to precisely pinpoint what type of built environment characterized  
355 best areas where physical activity was performed [50,51]. Second, since this is an  
356 observational study, our findings may suffer from reverse causality, and it is possible that

357 individuals selected their place of residence based on neighborhood characteristics that  
358 favor their lifestyles [9]. However, evidence shows that the built environment influences  
359 physical activity independently of residential self-selection [10]. Third, the size of the  
360 population investigated is moderate (N=1,889), and thus there is a low number of  
361 individuals to constitute the spatial clusters observed, resulting in a limited statistical  
362 power. Fourth, we did not differentiate between transportation and recreational MVPA, and  
363 such a distinction could have been of interest to identify how the built environment affects  
364 different practices of physical activity [52]. Fifth, our results may not be entirely  
365 generalizable to other locations as built environment characteristics may differ.

## 366 **Strengths**

367 To the best of our knowledge, this is the first study that assesses spatial dependence of  
368 objectively measured MVPA using individual geolocated data, making our study less prone  
369 to bias [32,53]. We used additional variables (i.e. accessibility to cycling pathways,  
370 pedestrian areas, and public transport) that are not usually assessed in the study of spatial  
371 patterns of physical activity and the built environment, and we considered multiple  
372 dimensions of the neighborhood environment [54]. We showed that this inclusion brings a  
373 new perspective and evidence for such association. Additionally, we assessed individual  
374 spatial clusters of MVPA, which allowed us to evaluate the spatial dependence of MVPA  
375 on a local scale.

## 376 **Impact for public health policy**

377 Our findings highlight the utility of spatial analysis to explore the influence the  
378 characteristics of the built environment have on physical activity and to identify  
379 populations at risk, which could be useful for the development of public health policies

380 related to urban planning. Evidence on the success of initiatives modifying the built  
381 environment infrastructure to improve physical activity levels is promising [55]. Therefore,  
382 policymakers should be encouraged to favor the development of public built environment  
383 interventions that promote healthier behaviors -and indirectly more ecological cities-, such  
384 as increasing the availability of parks and cycling pathways and facilitating access to public  
385 transport and pedestrian areas.

## 386 **Conclusions**

387 Although with a low number of individuals, geographic clusters of high MVPA were  
388 detected in urban areas where specific compositions of the built environment favors  
389 physical activity. Adjustment for socioeconomic and demographic factors did not impact  
390 the geographic patterns or built environment characteristics of the clusters. Favoring the  
391 planning of urban environments promoting physical activity and active lifestyles should be  
392 considered when developing public policies.

393 **Acknowledgments**

394 None.

## 395 **References**

- 396 1. Lee I-M, Shiroma EJ, Lobelo F, Puska P, Blair SN, Katzmarzyk PT. Effect of physical inactivity  
397 on major non-communicable diseases worldwide: an analysis of burden of disease and life  
398 expectancy. *The Lancet*. 2012;380: 219–229. doi:10.1016/S0140-6736(12)61031-9
- 399 2. WHO. Global action plan on physical activity 2018–2030: more active people for a healthier  
400 world. Geneva: World Health Organization; 2018.
- 401 3. WHO. Global recommendations on physical activity for health. Geneva: World Health  
402 Organization; 2010.
- 403 4. Guthold R, Stevens GA, Riley LM, Bull FC. Worldwide trends in insufficient physical activity  
404 from 2001 to 2016: a pooled analysis of 358 population-based surveys with 1.9 million  
405 participants. *The Lancet Global Health*. 2018;6: e1077–e1086. doi:10.1016/S2214-  
406 109X(18)30357-7
- 407 5. Bauman AE, Reis RS, Sallis JF, Wells JC, Loos RJ, Martin BW. Correlates of physical activity:  
408 why are some people physically active and others not? *The Lancet*. 2012;380: 258–271.  
409 doi:10.1016/S0140-6736(12)60735-1
- 410 6. Trost SG, Owen N, Bauman AE, Sallis JF, Brown W. Correlates of adults' participation in  
411 physical activity: review and update. *Medicine & Science in Sports & Exercise*. 2002;34:  
412 1996–2001.
- 413 7. Sallis James F., Floyd Myron F., Rodríguez Daniel A., Saelens Brian E. Role of Built  
414 Environments in Physical Activity, Obesity, and Cardiovascular Disease. *Circulation*. 2012;125:  
415 729–737. doi:10.1161/CIRCULATIONAHA.110.969022
- 416 8. WHO. Towards more physical activity in cities: Transforming public spaces to promote  
417 physical activity - a key contributor to achieving the Sustainable Development Goals in  
418 Europe. Copenhagen: World Health Organization, Regional Office for Europe; 2017.
- 419 9. Kärmeniemi M, Lankila T, Ikäheimo T, Koivumaa-Honkanen H, Korpelainen R. The Built  
420 Environment as a Determinant of Physical Activity: A Systematic Review of Longitudinal  
421 Studies and Natural Experiments. *Ann Behav Med*. 2018;52: 239–251.  
422 doi:10.1093/abm/kax043
- 423 10. McCormack GR, Shiell A. In search of causality: a systematic review of the relationship  
424 between the built environment and physical activity among adults. *International Journal of*  
425 *Behavioral Nutrition and Physical Activity*. 2011;8: 125. doi:10.1186/1479-5868-8-125
- 426 11. Smith M, Hosking J, Woodward A, Witten K, MacMillan A, Field A, et al. Systematic literature  
427 review of built environment effects on physical activity and active transport – an update and  
428 new findings on health equity. *International Journal of Behavioral Nutrition and Physical*  
429 *Activity*. 2017;14: 158. doi:10.1186/s12966-017-0613-9

- 430 12. Mena C, Fuentes E, Ormazábal Y, Triana J, Palomo I. Spatial distribution and physical activity:  
431 implications for prevention of cardiovascular diseases. *Sport Sci Health*. 2017;13: 9–16.  
432 doi:10.1007/s11332-017-0349-6
- 433 13. Rahnama MR, Shaddel L. Urban Green Space Is Spatially Associated with Cardiovascular  
434 Disease Occurrence in Women of Mashhad: a Spatial Analysis of Influential Factors on their  
435 Presence in Urban Green Spaces. *J Urban Health*. 2019;96: 653–668. doi:10.1007/s11524-  
436 019-00373-1
- 437 14. Auchincloss AH, Gebreab SY, Mair C, Roux AVD. A Review of Spatial Methods in  
438 Epidemiology, 2000–2010. *Annu Rev Public Health*. 2012;33: 107–122. doi:10.1146/annurev-  
439 publhealth-031811-124655
- 440 15. Greenough PG, Nelson EL. Beyond mapping: a case for geospatial analytics in humanitarian  
441 health. *Conflict and Health*. 2019;13: 50. doi:10.1186/s13031-019-0234-9
- 442 16. An R, Li X, Jiang N. Geographical Variations in the Environmental Determinants of Physical  
443 Inactivity among U.S. Adults. *International Journal of Environmental Research and Public  
444 Health*. 2017;14: 1326. doi:10.3390/ijerph14111326
- 445 17. Lee KH, Dvorak RG, Schuett MA, van Riper CJ. Understanding spatial variation of physical  
446 inactivity across the continental United States. *Landscape and Urban Planning*. 2017;168:  
447 61–71. doi:10.1016/j.landurbplan.2017.09.020
- 448 18. Mayne DJ, Morgan GG, Jalaludin BB, Bauman AE. The contribution of area-level walkability to  
449 geographic variation in physical activity: a spatial analysis of 95,837 participants from the 45  
450 and Up Study living in Sydney, Australia. *Population Health Metrics*. 2017;15: 38.  
451 doi:10.1186/s12963-017-0149-x
- 452 19. Tamura K, Puett RC, Hart JE, Starnes HA, Laden F, Troped PJ. Spatial clustering of physical  
453 activity and obesity in relation to built environment factors among older women in three U.S.  
454 states. *BMC Public Health*. 2014;14: 1322. doi:10.1186/1471-2458-14-1322
- 455 20. Wang J, Lee K, Kwan M-P. Environmental Influences on Leisure-Time Physical Inactivity in the  
456 U.S.: An Exploration of Spatial Non-Stationarity. *ISPRS International Journal of Geo-  
457 Information*. 2018;7: 143. doi:10.3390/ijgi7040143
- 458 21. Huang L, Stinchcomb DG, Pickle LW, Dill J, Berrigan D. Identifying Clusters of Active  
459 Transportation Using Spatial Scan Statistics. *American Journal of Preventive Medicine*.  
460 2009;37: 157–166. doi:10.1016/j.amepre.2009.04.021
- 461 22. Schuurman N, Peters PA, Oliver LN. Are Obesity and Physical Activity Clustered? A Spatial  
462 Analysis Linked to Residential Density. *Obesity*. 2009;17: 2202–2209.  
463 doi:https://doi.org/10.1038/oby.2009.119
- 464 23. Valson JS, Kutty VR, Soman B, Jissa VT. Spatial Clusters of Diabetes and Physical Inactivity: Do  
465 Neighborhood Characteristics in High and Low Clusters Differ? *Asia Pac J Public Health*.  
466 2019;31: 612–621. doi:10.1177/1010539519879322



- 467 24. Houston D. Implications of the modifiable areal unit problem for assessing built environment  
468 correlates of moderate and vigorous physical activity. *Applied Geography*. 2014;50: 40–47.  
469 doi:10.1016/j.apgeog.2014.02.008
- 470 25. Kwan M-P. The Uncertain Geographic Context Problem. *Annals of the Association of*  
471 *American Geographers*. 2012;102: 958–968. doi:10.1080/00045608.2012.687349
- 472 26. Firmann M, Mayor V, Vidal PM, Bochud M, Pécoud A, Hayoz D, et al. The CoLaus study: a  
473 population-based study to investigate the epidemiology and genetic determinants of  
474 cardiovascular risk factors and metabolic syndrome. *BMC Cardiovascular Disorders*. 2008;8:  
475 6. doi:10.1186/1471-2261-8-6
- 476 27. Gubelmann C, Vollenweider P, Marques-Vidal P. Of weekend warriors and couch potatoes:  
477 Socio-economic determinants of physical activity in Swiss middle-aged adults. *Preventive*  
478 *Medicine*. 2017;105: 350–355. doi:10.1016/j.ypmed.2017.10.016
- 479 28. Esliger DW, Rowlands AV, Hurst TL, Catt M, Murray P, Eston RG. Validation of the GENE  
480 Accelerometer. *Med Sci Sports Exerc*. 2011;43: 1085–1093.  
481 doi:10.1249/MSS.0b013e31820513be
- 482 29. Migueles JH, Rowlands AV, Huber F, Sabia S, Hees VT van. GGIR: A Research Community–  
483 Driven Open Source R Package for Generating Physical Activity and Sleep Outcomes From  
484 Multi-Day Raw Accelerometer Data. *JMPB*. 2019;2: 188–196. doi:10.1123/jmpb.2018-0063
- 485 30. Tom White. Thomite/pampro v0.4.0. Zenodo; 2018. doi:10.5281/zenodo.1187043
- 486 31. Dillon CB, Fitzgerald AP, Kearney PM, Perry IJ, Rennie KL, Kozarski R, et al. Number of Days  
487 Required to Estimate Habitual Activity Using Wrist-Worn GENEActiv Accelerometer: A Cross-  
488 Sectional Study. *PLOS ONE*. 2016;11: e0109913. doi:10.1371/journal.pone.0109913
- 489 32. Frank LD, Schmid TL, Sallis JF, Chapman J, Saelens BE. Linking objectively measured physical  
490 activity with objectively measured urban form: Findings from SMARTRAQ. *American Journal*  
491 *of Preventive Medicine*. 2005;28: 117–125. doi:10.1016/j.amepre.2004.11.001
- 492 33. Tobler W. Three Presentations on Geographical Analysis and Modeling: Non- Isotropic  
493 Geographic Modeling; Speculations on the Geometry of Geography; and Global Spatial  
494 Analysis. UC Santa Barbara: National Center for Geographic Information and Analysis. 1993.
- 495 34. Anselin L. Local Indicators of Spatial Association—LISA. *Geographical Analysis*. 1995;27: 93–  
496 115. doi:10.1111/j.1538-4632.1995.tb00338.x
- 497 35. Moran PAP. Notes on Continuous Stochastic Phenomena. *Biometrika*. 1950;37: 17–23.  
498 doi:10.2307/2332142
- 499 36. Joost S, Duruz S, Marques-Vidal P, Bochud M, Stringhini S, Paccaud F, et al. Persistent spatial  
500 clusters of high body mass index in a Swiss urban population as revealed by the 5-year  
501 GeoCoLaus longitudinal study. *BMJ Open*. 2016;6: e010145. doi:10.1136/bmjopen-2015-  
502 010145

- 503 37. R Core Team. R: A language and environment for statistical computing. R Foundation for  
504 Statistical Computing, Vienna, Austria; 2020.
- 505 38. Xun Li. rgeoda: R library for spatial data analysis. R package version 0.0.4. 2019.
- 506 39. Edzer Pebesma. Simple Features for R: Standardized Support for Spatial Vector Data. R  
507 package version 0.9-1. 2018.
- 508 40. Hadley Wickham. ggplot2: Elegant Graphics for Data Analysis. R package version 3.3.2. 2016.
- 509 41. Koohsari MJ, Hanibuchi T, Nakaya T, Shibata A, Ishii K, Liao Y, et al. Associations of  
510 Neighborhood Environmental Attributes with Walking in Japan: Moderating Effects of Area-  
511 Level Socioeconomic Status. *J Urban Health*. 2017;94: 847–854. doi:10.1007/s11524-017-  
512 0199-1
- 513 42. Sugiyama T, Howard NJ, Paquet C, Coffee NT, Taylor AW, Daniel M. Do Relationships  
514 Between Environmental Attributes and Recreational Walking Vary According to Area-Level  
515 Socioeconomic Status? *J Urban Health*. 2015;92: 253–264. doi:10.1007/s11524-014-9932-1
- 516 43. Weiss CC, Purciel M, Bader M, Quinn JW, Lovasi G, Neckerman KM, et al. Reconsidering  
517 Access: Park Facilities and Neighborhood Disamenities in New York City. *J Urban Health*.  
518 2011;88: 297–310. doi:10.1007/s11524-011-9551-z
- 519 44. Mäki-Opas TE, Borodulin K, Valkeinen H, Stenholm S, Kunst AE, Abel T, et al. The contribution  
520 of travel-related urban zones, cycling and pedestrian networks and green space to  
521 commuting physical activity among adults – a cross-sectional population-based study using  
522 geographical information systems. *BMC Public Health*. 2016;16: 760. doi:10.1186/s12889-  
523 016-3264-x
- 524 45. Garden FL, Jalaludin BB. Impact of Urban Sprawl on Overweight, Obesity, and Physical  
525 Activity in Sydney, Australia. *J Urban Health*. 2009;86: 19–30. doi:10.1007/s11524-008-9332-  
526 5
- 527 46. Charreire H, Weber C, Chaix B, Salze P, Casey R, Banos A, et al. Identifying built  
528 environmental patterns using cluster analysis and GIS: Relationships with walking, cycling  
529 and body mass index in French adults. *International Journal of Behavioral Nutrition and*  
530 *Physical Activity*. 2012;9: 59. doi:10.1186/1479-5868-9-59
- 531 47. Cerin E, Mitáš J, Cain KL, Conway TL, Adams MA, Schofield G, et al. Do associations between  
532 objectively-assessed physical activity and neighbourhood environment attributes vary by  
533 time of the day and day of the week? IPEN adult study. *International Journal of Behavioral*  
534 *Nutrition and Physical Activity*. 2017;14: 34. doi:10.1186/s12966-017-0493-z
- 535 48. Clary C, Lewis D, Limb ES, Nightingale CM, Ram B, Rudnicka AR, et al. Weekend and weekday  
536 associations between the residential built environment and physical activity: Findings from  
537 the ENABLE London study. *PLOS ONE*. 2020;15: e0237323.  
538 doi:10.1371/journal.pone.0237323

- 539 49. Michimi A, Wimberly MC. Spatial Patterns of Obesity and Associated Risk Factors in the  
540 Conterminous U.S. *American Journal of Preventive Medicine*. 2010;39: e1–e12.  
541 doi:10.1016/j.amepre.2010.04.008
- 542 50. Carlson JA, Frank LD, Ulmer J, Conway TL, Saelens BE, Cain KL, et al. Work and Home  
543 Neighborhood Design and Physical Activity. *Am J Health Promot*. 2018;32: 1723–1729.  
544 doi:10.1177/0890117118768767
- 545 51. Holliday KM, Howard AG, Emch M, Rodríguez DA, Rosamond WD, Evenson KR. Where Are  
546 Adults Active? An Examination of Physical Activity Locations Using GPS in Five US Cities. *J*  
547 *Urban Health*. 2017;94: 459–469. doi:10.1007/s11524-017-0164-z
- 548 52. Saelens BE, Handy SL. Built Environment Correlates of Walking: A Review. *Medicine &*  
549 *Science in Sports & Exercise*. 2008;40: S550. doi:10.1249/MSS.0b013e31817c67a4
- 550 53. Limb ES, Ahmad S, Cook DG, Kerry SM, Ekelund U, Whincup PH, et al. Measuring change in  
551 trials of physical activity interventions: a comparison of self-report questionnaire and  
552 accelerometry within the PACE-UP trial. *International Journal of Behavioral Nutrition and*  
553 *Physical Activity*. 2019;16: 10. doi:10.1186/s12966-018-0762-5
- 554 54. Schüle SA, Bolte G. Interactive and Independent Associations between the Socioeconomic  
555 and Objective Built Environment on the Neighbourhood Level and Individual Health: A  
556 Systematic Review of Multilevel Studies. *PLOS ONE*. 2015;10: e0123456.  
557 doi:10.1371/journal.pone.0123456
- 558 55. Mayne SL, Auchincloss AH, Michael YL. Impact of Policy and Built Environment Changes on  
559 Obesity-related Outcomes: A Systematic Review of Naturally-Occurring Experiments. *Obes*  
560 *Rev*. 2015;16: 362–375. doi:10.1111/obr.12269

561 **Supporting information**

562 **S1 Fig. Built environmental characteristics of the Lausanne urban area.**

563 **S2 Fig. Spatial clusters of raw MVPA using Local Moran's I statistics and the**  
564 **PAMPRO algorithm.**

565 **S3 Fig. Spatial clusters of raw MVPA for weekdays (a) and weekends (b) using Local**  
566 **Moran's I statistics.**

567 **S1 Appendix. Regression results of MVPA adjusted for socioeconomic and**  
568 **demographic factors.**

569 **S4 Fig. Spatial clusters of raw MVPA within spatial lags of 400 (a), 600 (b), 1000 (c),**  
570 **and 1200 m (d) using Local Moran's I statistics.**

571 **S1 Table. Comparison of population and built environment characteristics between**  
572 **included and removed individuals.**

573 **S2 Table. Population socioeconomic and demographic characteristics of raw MVPA**  
574 **spatial clusters.**

575 **S3 Table. Population socioeconomic and demographic characteristics of adjusted**  
576 **MVPA spatial clusters.**

### Local Moran's I

Raw MVPA distribution (1889)

Spatial lag: 800m

Significance level:  $p \leq 0.05$  (999 permutations)

- High-High (27)
- High-Low (14)
- Not significant (1793)
- Low-High (42)
- Low-Low (13)

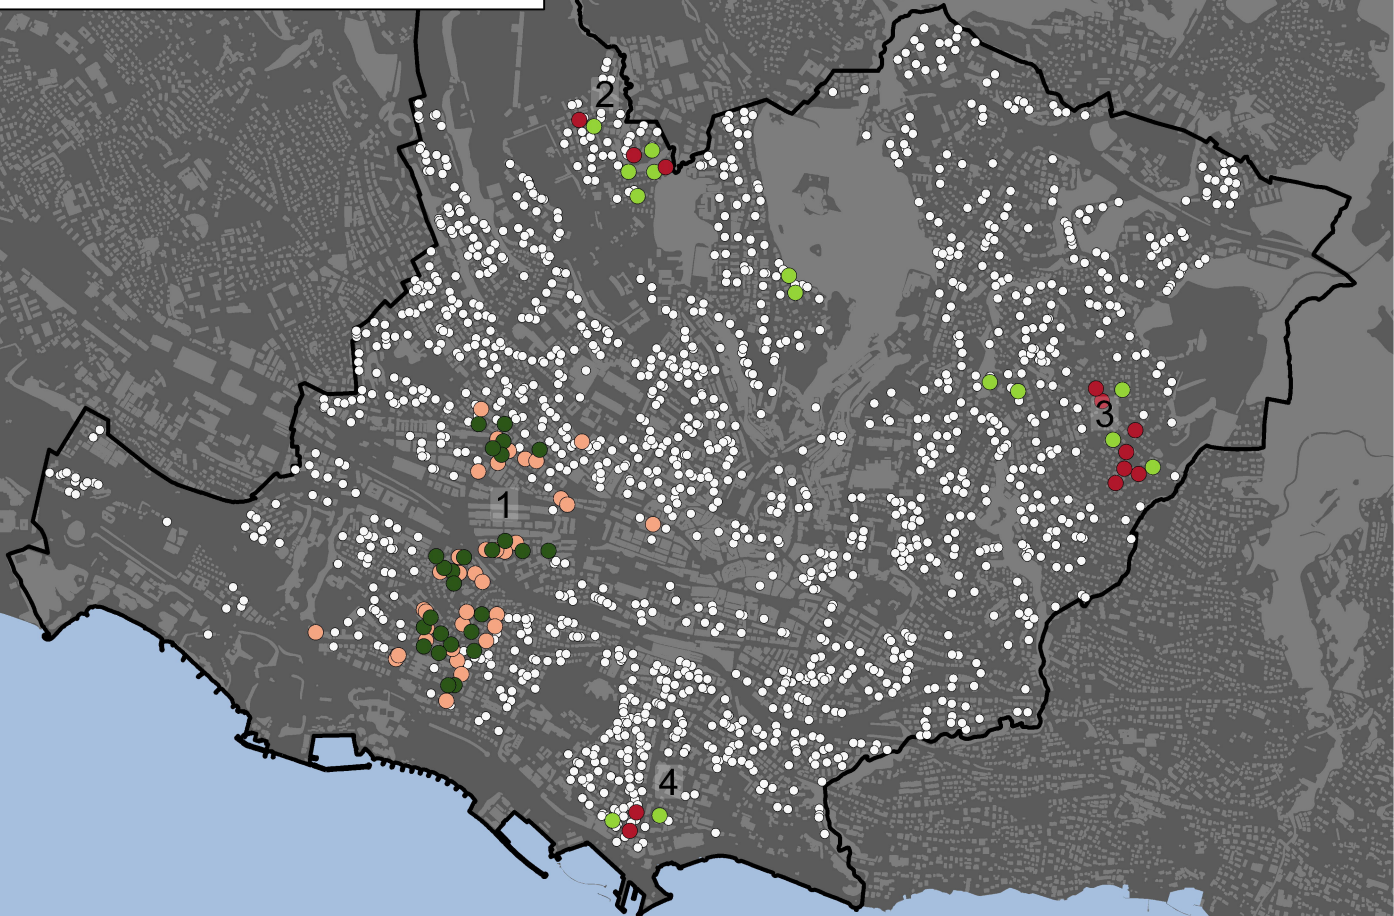

Lake Geneva

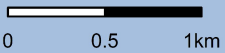



### Local Moran's I

Adjusted MVPA distribution (1889)

Spatial lag: 800m

Significance level:  $p \leq 0.05$  (999 permutations)

- High-High (57)
- High-Low (25)
- Not significant (1724)
- Low-High (55)
- Low-Low (28)

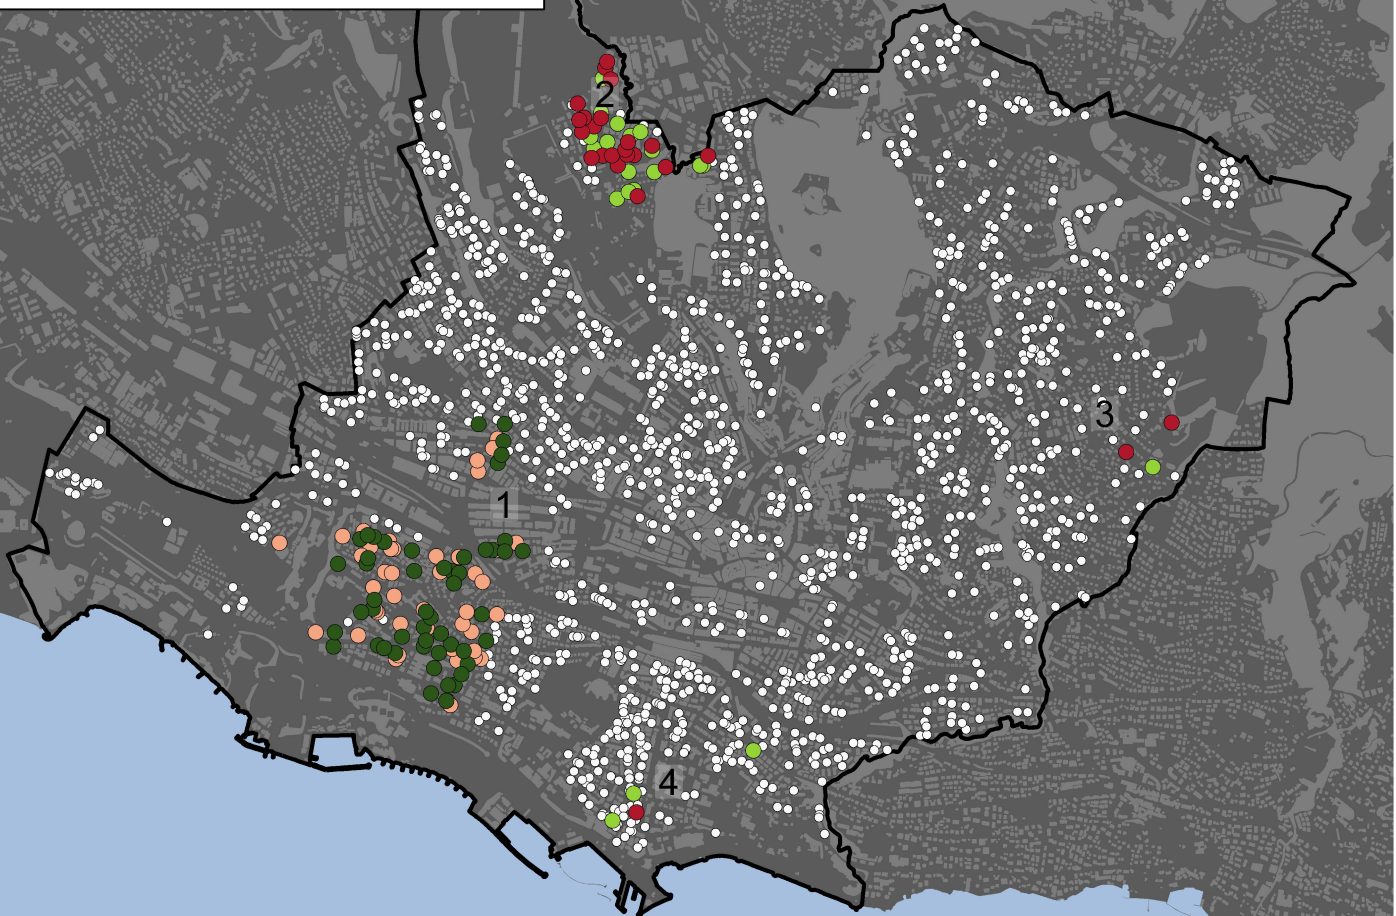

Lake Geneva



Source: https://medrxiv.org/content/10.1101/2021.04.23.21255966v3.full.pdf
