# Supplementary material for: Geographic clusters of objectively measured physical activity and the characteristics of their built environment in a Swiss urban area
Source: medRxiv preprint, doi:10.1101/2021.04.23.21255966, version 3 (2021-05-11)
Supplement: S1 Fig [file 255966_file04.docx]

**SUPPLEMENTARY INFORMATION**

**Urban area of Lausanne**

**S1 Fig. Built environmental characteristics of the Lausanne urban area.**

**
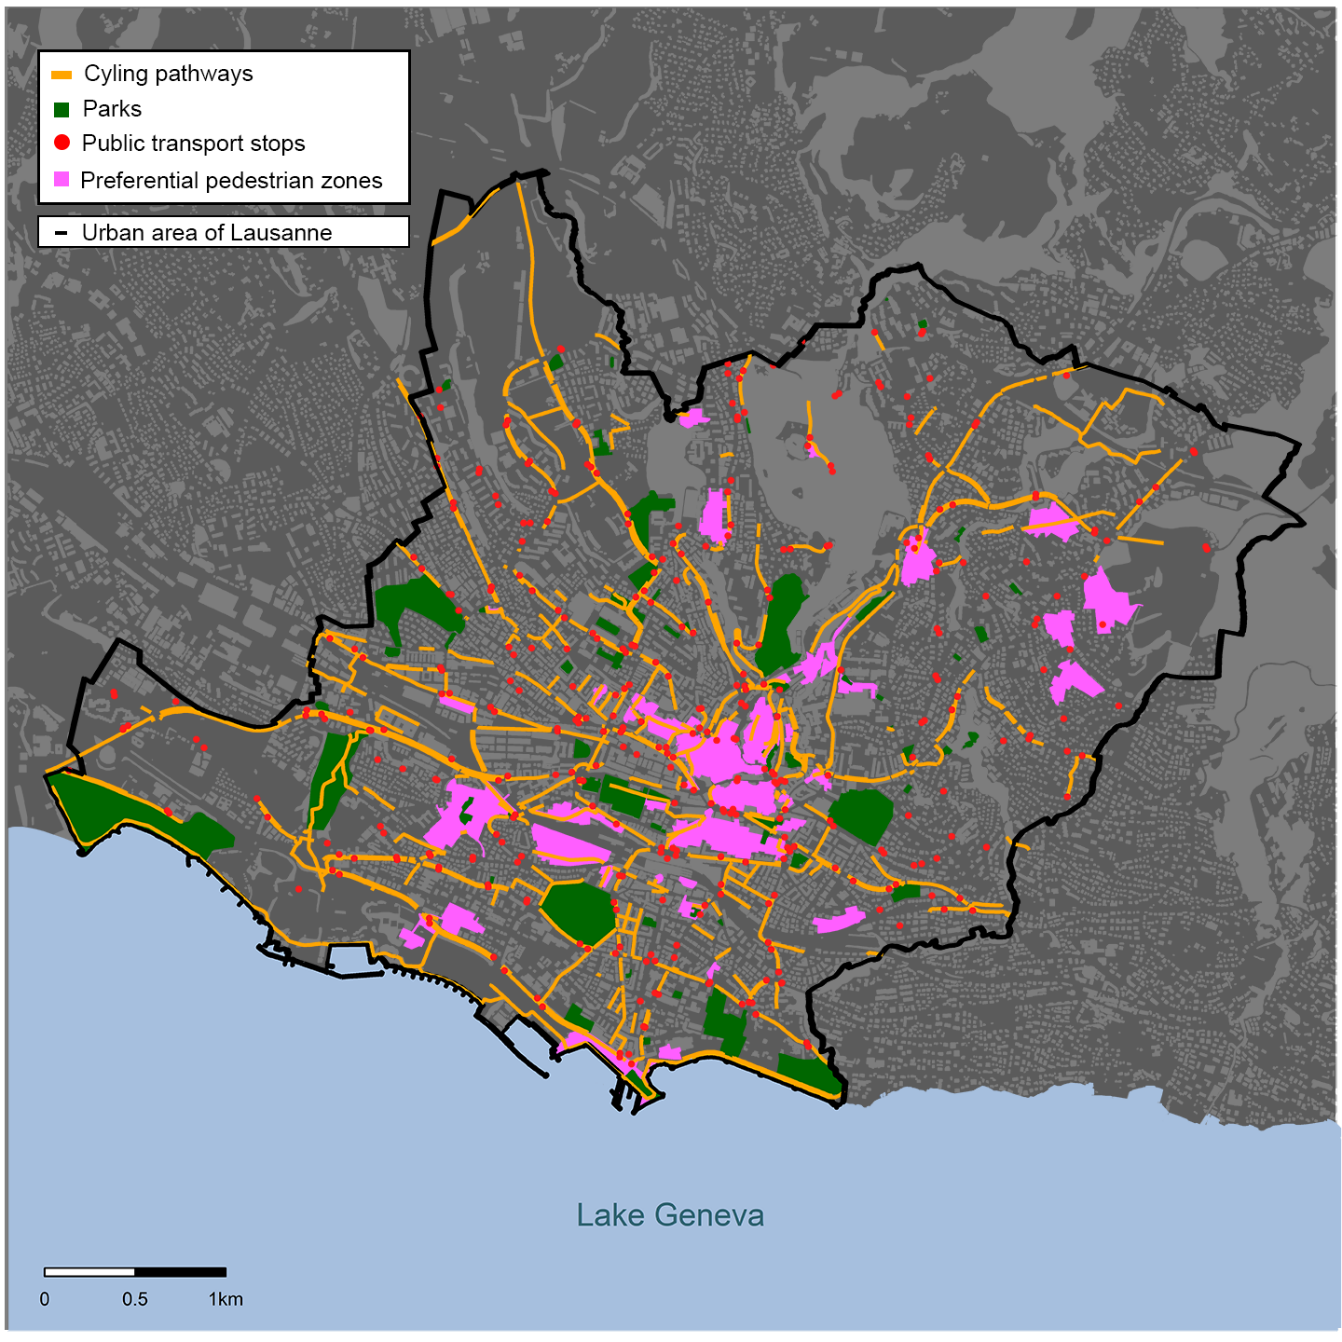
**
